# Supplementary material for: Endophytes from Halotolerant Plants Aimed to Overcome Salinity and Draught
Source: MDPI journal article supplement (doi:10.3390/plants11212992), 2022-11-06
Supplement: s1 [file s1]

## Supplementary Materials

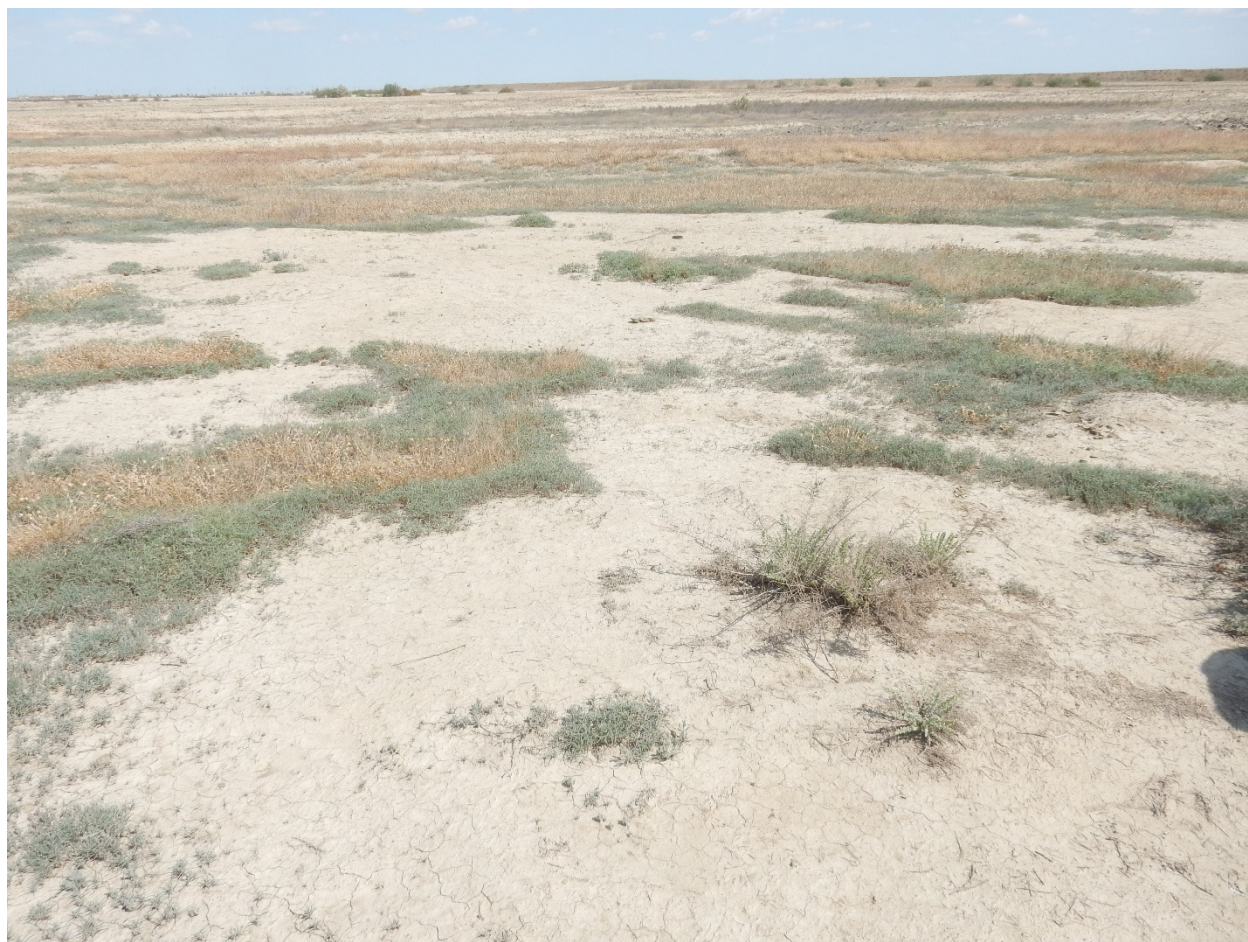

**Figure S1.** Place near the village of Winter Rate Neftekumsky district, Stavropol Territory, 44.5453 N 45.1907 E.



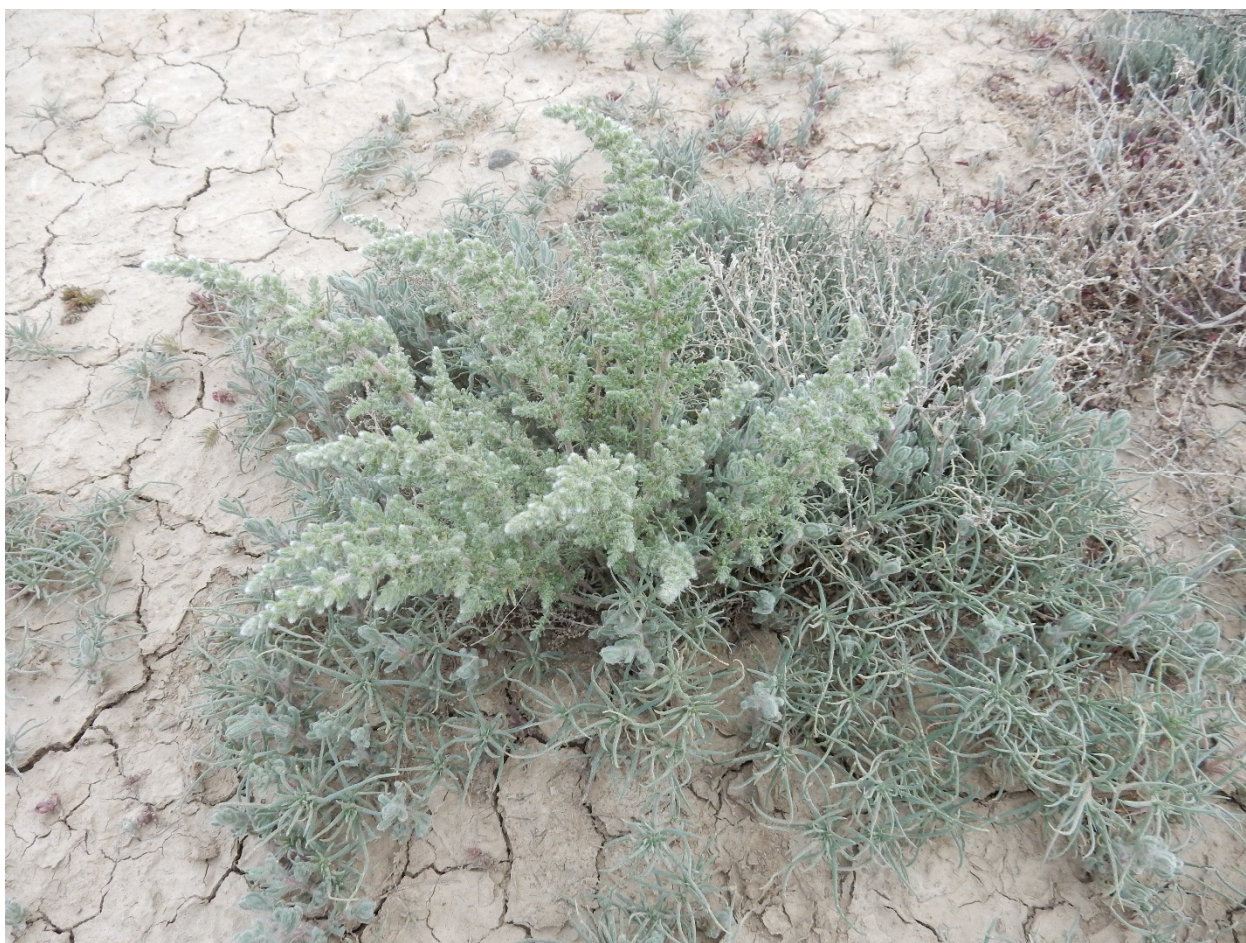

**Figure S2.** Plants *Salicornia europaea* L., *Salsola australis* R.Br. and *Bassia sedoides* (Pall.) Asch., growing in one place.



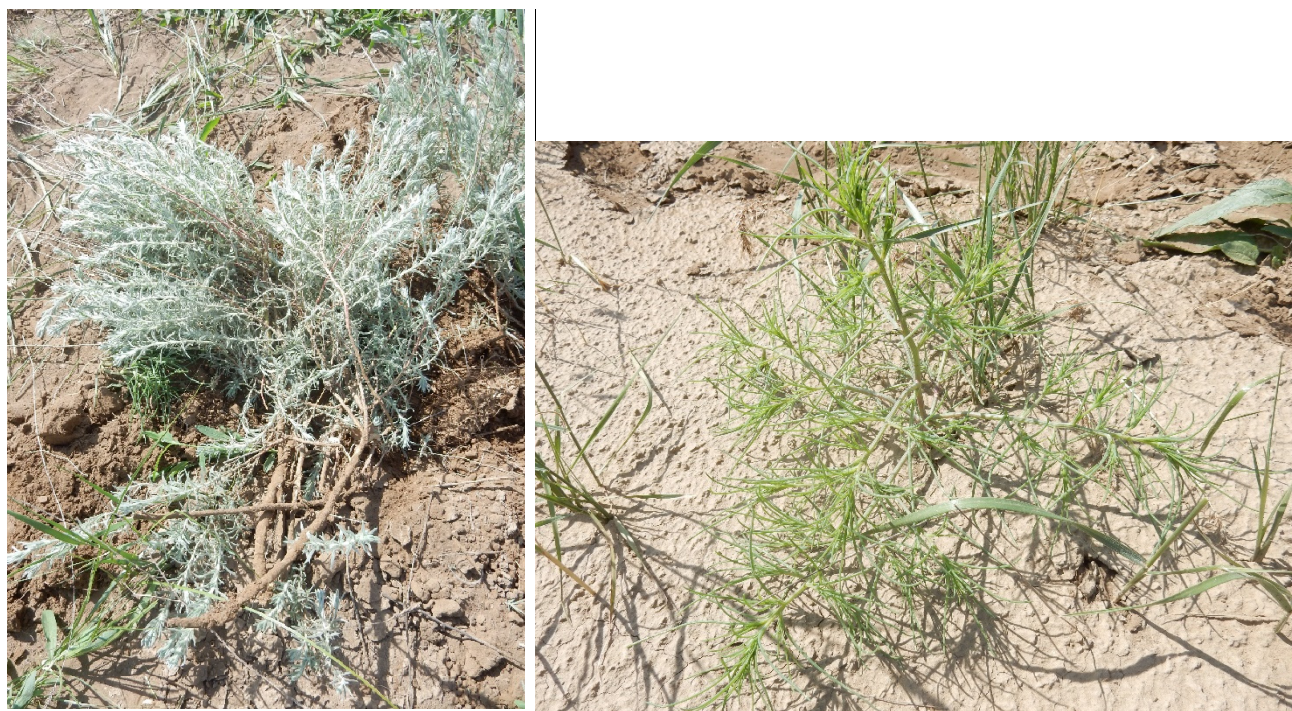

**Figure S3.** Place near the village of Burgun-Majary (Kurgan) Levokumsky district, Stavropol Territory, 44.5017 N 44.2901 E. *Kochia prostrata* (L.) Schrad A (left) and *Salsola australis* R.Br. (right).
